# Supplementary material for: Extent of resection and molecular pathologic subtype are potent prognostic factors of adult WHO grade II glioma
Source: PubMed Central journal article supplement (PMC7005814; doi:10.1038/s41598-020-59089-x), 2020-02-07
Supplement: 41598_2020_59089_MOESM1_ESM.pdf [file 41598_2020_59089_MOESM1_ESM.pdf]

# **Extent of resection and molecular pathologic subtype are potent prognostic factors of adult WHO grade II glioma**

Jinhyun Choi, MD,<sup>1</sup> Se Hoon Kim, MD, PhD,<sup>2</sup> Sung Soo Ahn, MD, PhD,<sup>3</sup> Hye Jin Choi, MD, PhD,<sup>4</sup> Hong In Yoon, MD, PhD,<sup>5</sup> Jae Ho Cho, MD, PhD,<sup>5</sup> Tae Hoon Roh, MD, PhD,<sup>6</sup> Seok-Gu Kang, MD, PhD,<sup>7</sup> Jong Hee Chang, MD, PhD,<sup>7\*</sup> and Chang-Ok Suh, MD, PhD<sup>8\*</sup>

<sup>1</sup>Department of Radiation Oncology, Jeju National University Hospital, Jeju, Korea

<sup>2</sup>Department of Pathology, Yonsei University College of Medicine, Seoul, Korea

<sup>3</sup>Department of Radiology, Yonsei University College of Medicine, Seoul, Korea

<sup>4</sup>Department of Internal Medicine, Yonsei University College of Medicine, Seoul, Korea

<sup>5</sup>Department of Radiation Oncology, Yonsei University College of Medicine, Seoul, Korea

<sup>6</sup>Department of Neurosurgery, Ajou University School of Medicine, Suwon, Korea

<sup>7</sup>Department of Neurosurgery, Yonsei University College of Medicine, Seoul, Korea

<sup>8</sup>Department of Radiation Oncology, CHA Bundang Medical Center, CHA University, Seongnam, Korea

**Table S1** Patients' characteristics according to the use of radiotherapy

| Variable   | Level       | RT (N=102) | %    | No RT (N=51) | %    |
|------------|-------------|------------|------|--------------|------|
| Tumor size | < 6 cm      | 64         | 62.7 | 44           | 86.3 |
|            | ≥ 6 cm      | 35         | 34.3 | 7            | 13.7 |
|            | Unevaluable | 3          | 2.9  | 0            | 0    |
| EOR        | GTR         | 29         | 28.4 | 42           | 82.4 |
|            | STR         | 23         | 22.5 | 8            | 15.7 |
|            | PR          | 42         | 41.2 | 1            | 1.9  |
|            | Bx          | 8          | 7.8  | 0            | 0    |

Abbreviations: RT, radiotherapy; EOR, extent of resection; GTR, gross total resection; STR, subtotal

resection; PR, partial resection; Bx, biopsy

**Table S2** Recurrence rate according to extent of resection and the use of radiotherapy

| Molecular subtype                  | EOR          | Radiotherapy | Recurrence rate (%) |      |
|------------------------------------|--------------|--------------|---------------------|------|
| ODG, IDH-mutant & 1p/19q codeleted | GTR (24)     | RT (5)       | 0                   | 12.5 |
|                                    |              | no RT (19)   | 15.8                | 15.6 |
|                                    | Non-GTR (21) | RT (21)      | 19                  |      |
|                                    |              | no RT (0)    | -                   |      |
| DA, IDH-mutant                     | GTR (38)     | RT (21)      | 9.5                 | 18.4 |
|                                    |              | no RT (17)   | 29.4                | 33.8 |
|                                    | Non-GTR (42) | RT (35)      | 48.6                |      |
|                                    |              | no RT (7)    | 42.9                |      |
| DA, IDH-wild                       | GTR (9)      | RT (3)       | 66.7                | 44.4 |
|                                    |              | no RT (6)    | 33.3                | 53.6 |
|                                    | Non-GTR (19) | RT (17)      | 58.8                |      |
|                                    |              | no RT (2)    | 50                  |      |

Numbers in parentheses are the numbers of patients

Abbreviations: ODG, oligodendroglioma; DA, diffuse astrocytoma; EOR, extent of resection; GTR, gross total resection; RT, radiotherapy
