# Supplementary material for: Extent of resection and molecular pathologic subtype are potent prognostic factors of adult WHO grade II glioma
Source: PubMed Central journal article supplement (PMC7005814; doi:10.1038/s41598-020-59089-x), 2020-02-07
Supplement: 41598_2020_59089_MOESM3_ESM.pdf [file 41598_2020_59089_MOESM3_ESM.pdf]

## **Extent of resection and molecular pathologic subtype are potent prognostic factors of adult WHO grade II glioma**

Jinhyun Choi, MD,<sup>1</sup> Se Hoon Kim, MD, PhD,<sup>2</sup> Sung Soo Ahn, MD, PhD,<sup>3</sup> Hye Jin Choi, MD, PhD,<sup>4</sup>  
Hong In Yoon, MD, PhD,<sup>5</sup> Jae Ho Cho, MD, PhD,<sup>5</sup> Tae Hoon Roh, MD, PhD,<sup>6</sup> Seok-Gu Kang, MD, PhD,<sup>7</sup>  
Jong Hee Chang, MD, PhD,<sup>7\*</sup> and Chang-Ok Suh, MD, PhD<sup>8\*</sup>

<sup>1</sup>Department of Radiation Oncology, Jeju National University Hospital, Jeju, Korea

<sup>2</sup>Department of Pathology, Yonsei University College of Medicine, Seoul, Korea

<sup>3</sup>Department of Radiology, Yonsei University College of Medicine, Seoul, Korea

<sup>4</sup>Department of Internal Medicine, Yonsei University College of Medicine, Seoul, Korea

<sup>5</sup>Department of Radiation Oncology, Yonsei University College of Medicine, Seoul, Korea

<sup>6</sup>Department of Neurosurgery, Ajou University School of Medicine, Suwon, Korea

<sup>7</sup>Department of Neurosurgery, Yonsei University College of Medicine, Seoul, Korea

<sup>8</sup>Department of Radiation Oncology, CHA Bundang Medical Center, CHA University, Seongnam, Korea

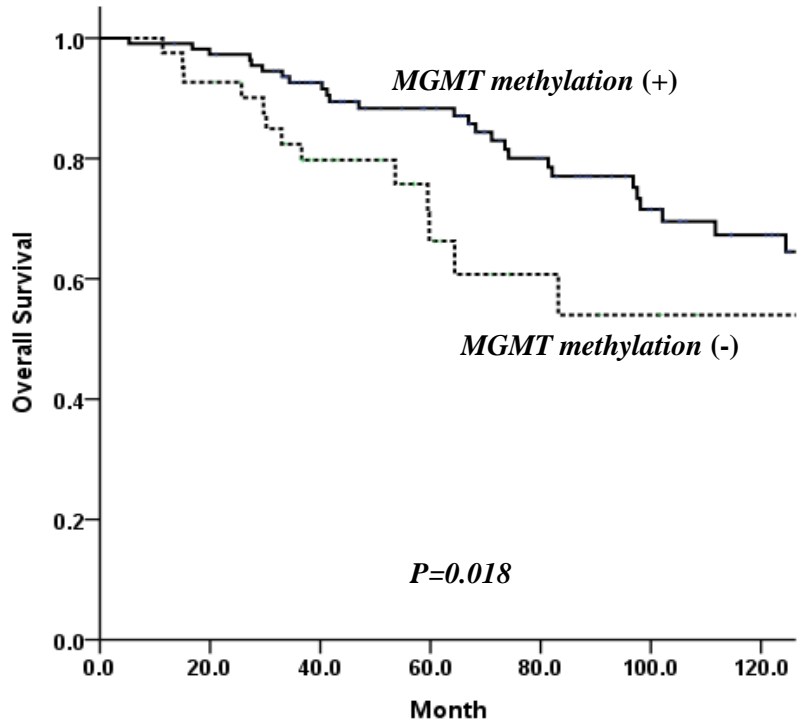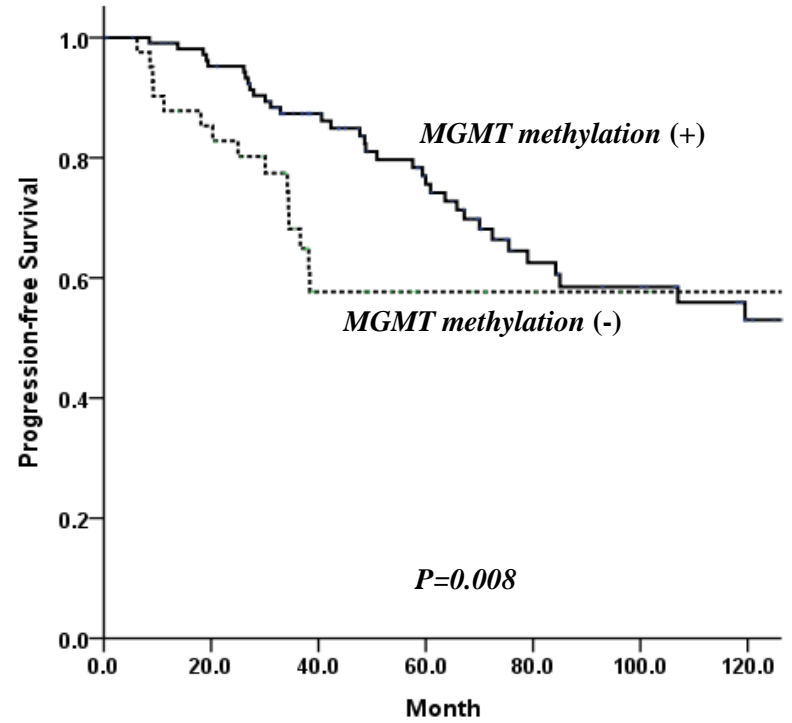

Number at risk

|           |     |    |    |    |     |     |
|-----------|-----|----|----|----|-----|-----|
| Methyl(+) | 101 | 82 | 66 | 49 | 34  | 16  |
| Methyl(-) | 41  | 35 | 22 | 12 | 6   | 2   |
|           | 20  | 40 | 60 | 80 | 100 | 120 |

Number at risk

|           |    |    |    |    |     |     |
|-----------|----|----|----|----|-----|-----|
| Methyl(+) | 90 | 68 | 48 | 31 | 23  | 8   |
| Methyl(-) | 29 | 11 | 7  | 4  | 3   | 1   |
|           | 20 | 40 | 60 | 80 | 100 | 120 |
